# Supplementary material for: Designed synthesis of Co-doped sponge-like In2O3 for highly sensitive detection of acetone gas
Source: Royal Society of Chemistry journal article supplement (doi:10.1039/c8ce02058b), 2019-01-01
Supplement: c8ce02058b1.pdf [file c8ce02058b1.pdf]

## Electronic Supplementary Information

### Designed synthesis of Co-doped spongy-like $\text{In}_2\text{O}_3$ for high sensitive detection of acetone gas

Xiaole Zhang,<sup>a,b</sup> Dalei Song,<sup>\*b</sup> Qi Liu,<sup>a,b</sup> Rongrong Chen,<sup>b,c</sup> Jingyuan Liu,<sup>\*a,b</sup>

Hongsen Zhang,<sup>a,b</sup> Jing Yu,<sup>a,b</sup> Peili Liu<sup>b</sup> and Jun Wang<sup>a,b,c</sup>

<sup>a</sup> Key Laboratory of Superlight Material and Surface Technology, Ministry of Education, Harbin Engineering University, 150001, PR China. E-mail: [liujingyuan1004@hrbeu.edu.cn](mailto:liujingyuan1004@hrbeu.edu.cn); [songdalei@hrbeu.edu.cn](mailto:songdalei@hrbeu.edu.cn); Fax: +86 451 8253 3026; Tel: +86 451 8253 3026.

<sup>b</sup> College of Materials Science and Chemical Engineering, Harbin Engineering University, 150001, PR China.

<sup>c</sup> Harbin Engineering University Assets Management Co., LTD, 150001, PR China.

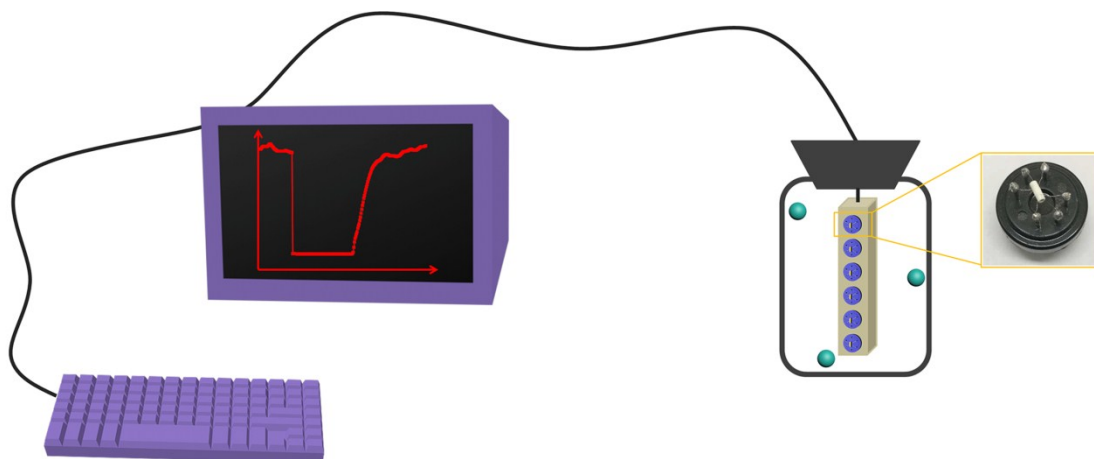

Fig. S1. The schematic illustration of acetone testing assembly.

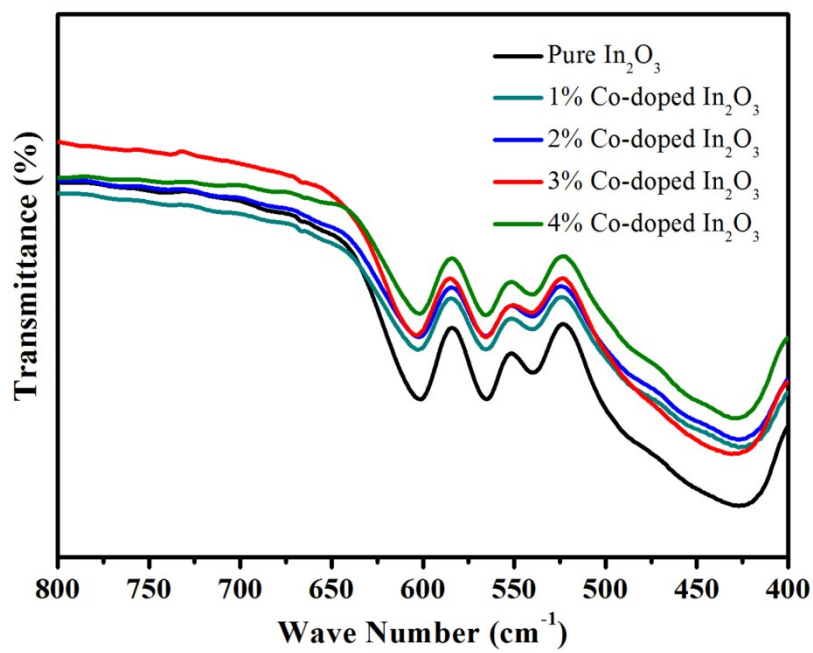

Fig. S2. FTIR spectra of pure  $\text{In}_2\text{O}_3$  and Co-doped  $\text{In}_2\text{O}_3$ .

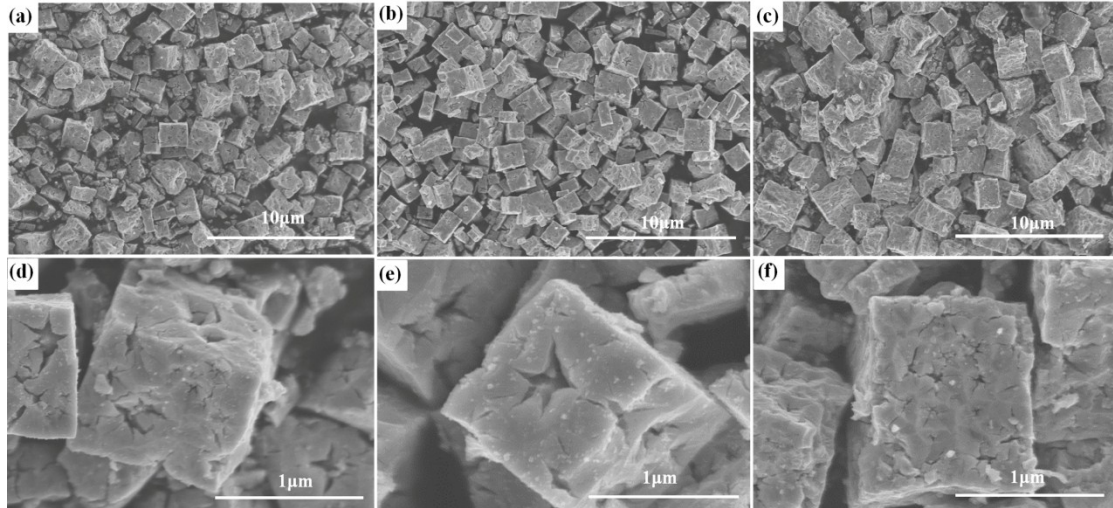

**Fig. S3.** SEM patterns of (a, d) 1 mol% Co-doped  $\text{In}_2\text{O}_3$ , (b, e) 2 mol% Co-doped  $\text{In}_2\text{O}_3$  and (c, f) 4 mol% Co-doped  $\text{In}_2\text{O}_3$ .

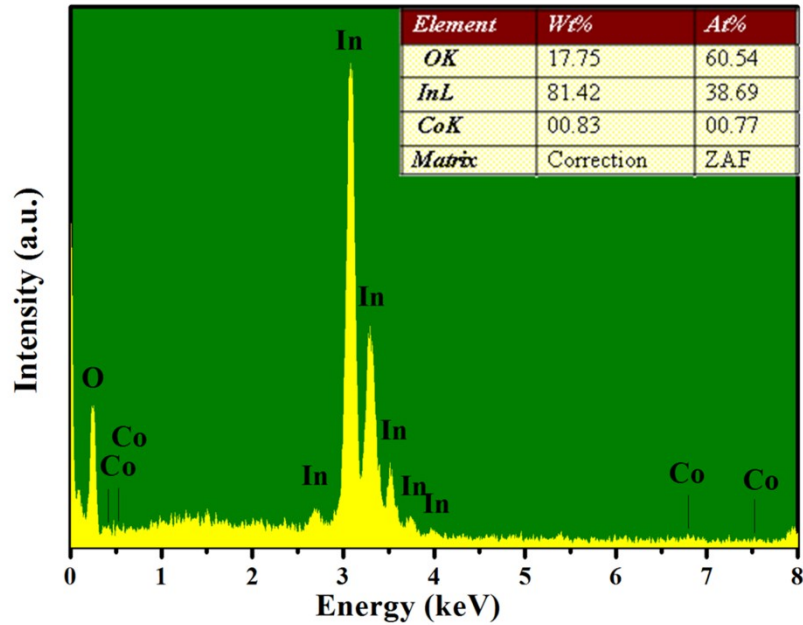

**Fig. S4.** The energy-dispersive X-ray spectroscopy (EDS) elemental spectrum of 3 mol% Co-doped  $\text{In}_2\text{O}_3$ .

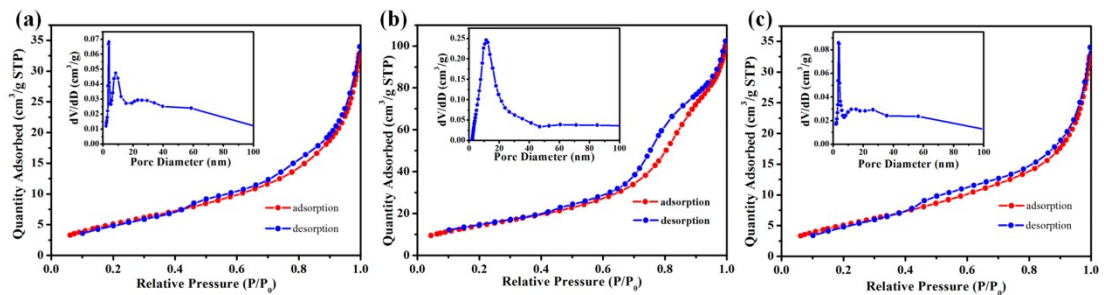

**Fig. S5.** Typical nitrogen adsorption–desorption isotherms and BJH pore-size distribution of (a) 1 mol% Co-doped  $\text{In}_2\text{O}_3$ , (b) 2 mol% Co-doped  $\text{In}_2\text{O}_3$  and (c) 4 mol% Co-doped  $\text{In}_2\text{O}_3$ .

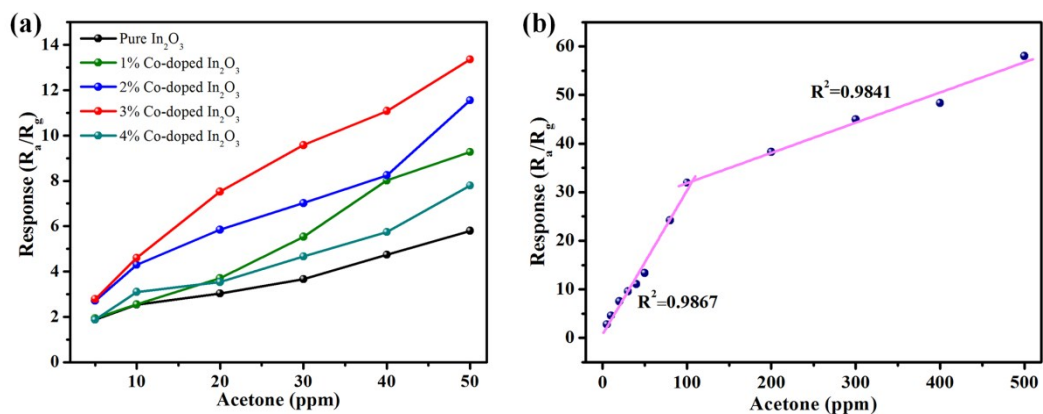

**Fig. S6.** (a) Relationship between the gas response and acetone concentration (5~50 ppm) at operation temperature of 240 °C; (b) The fitting curves between the responses of 3 mol% Co-doped  $\text{In}_2\text{O}_3$  sensor and acetone concentration at 240 °C.

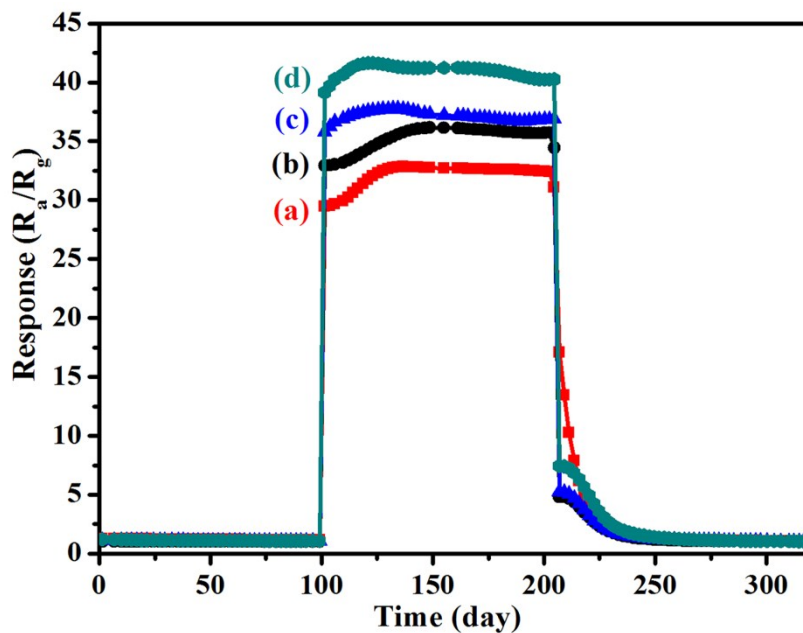

**Fig. S7.** Response of 3 mol% Co-doped  $\text{In}_2\text{O}_3$  to mixture of (a) 100 ppm acetone and 100 ppm water, (b) 100 ppm acetone and 100 ppm ethanol, (c) 100 ppm acetone and 100 ppm acetaldehyde and (d) 100 ppm acetone and 100 ppm methanol at 240 °C.

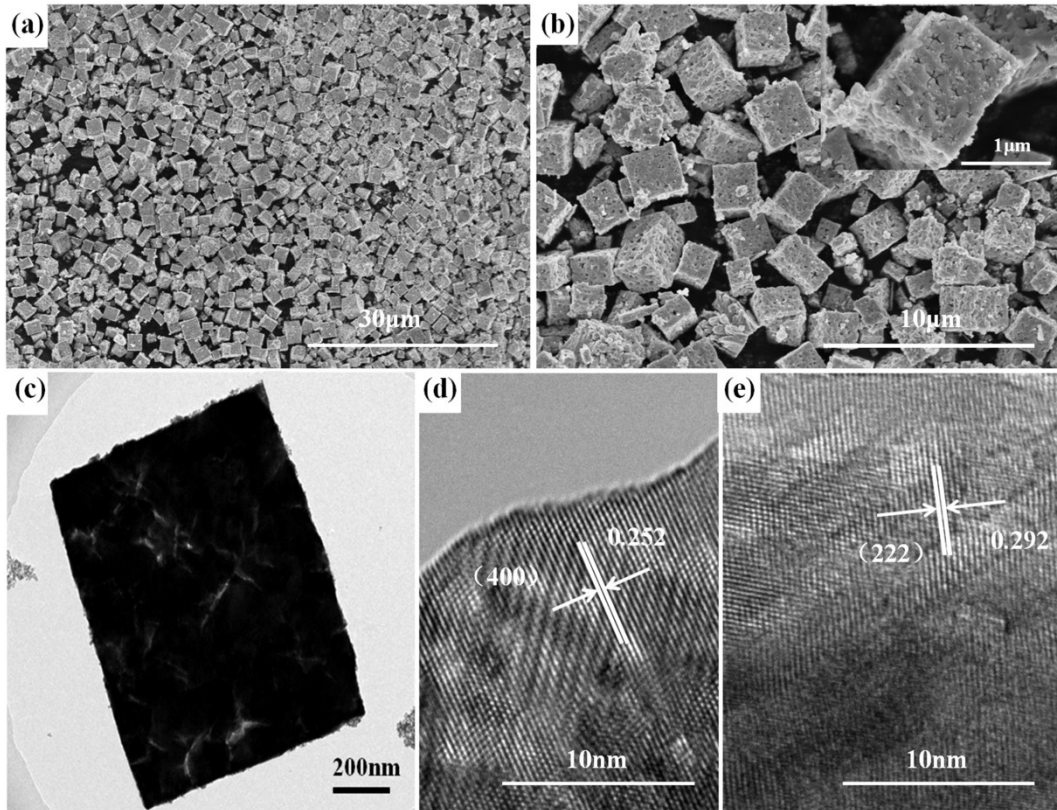

Fig. S8. (a-b) SEM images of 3 mol% Co-doped  $\text{In}_2\text{O}_3$  after 20th cycles, (c-e) TEM images of 3 mol% Co-doped  $\text{In}_2\text{O}_3$  after 20th cycles.

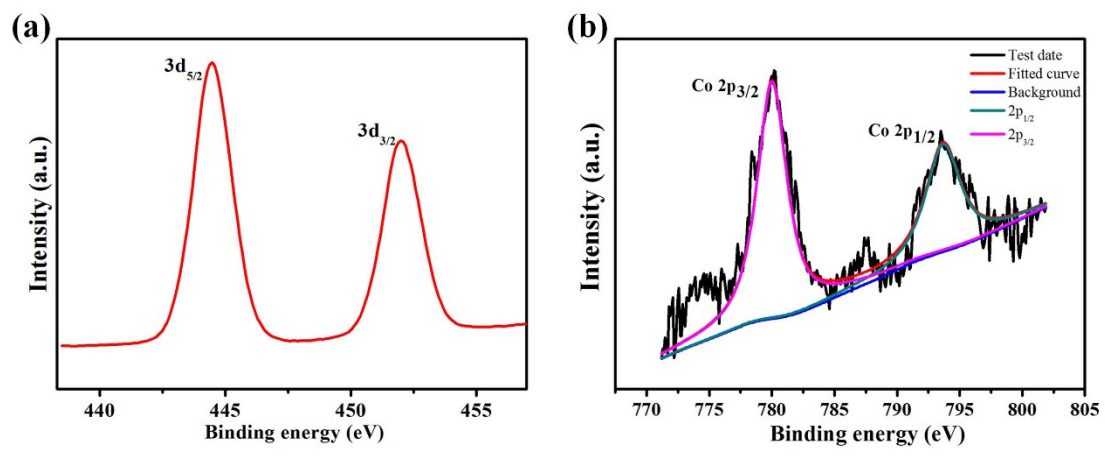

Fig. S9. The XPS spectra of (a) In 3d in pure  $\text{In}_2\text{O}_3$ , (b) Co 2p in 3 mol% Co-doped  $\text{In}_2\text{O}_3$ .

**Table S1.** Gas sensing properties of different sensing materials to acetone, as reported in the literature and the present study.

| sensing material                                       | acetone/con.(ppm) | temperature (°C) | response | res./rec. time (s) | reference |
|--------------------------------------------------------|-------------------|------------------|----------|--------------------|-----------|
| 1-D $\alpha$ -Ag <sub>2</sub> WO <sub>4</sub> nanorods | 10                | 350              | 2.7      | 30/46              | S1        |
| In <sub>2</sub> O <sub>3</sub> mesostructure           | 100               | 220              | 13.2     | 2/45               | S2        |
| NiO/ZnO hollow spheres                                 | 100               | 275              | 30       | 1/20               | S3        |
| raft-like Co <sub>3</sub> O <sub>4</sub>               | 200               | 180              | 9.2      | 58/17              | S4        |
| Eu-doped SnO <sub>2</sub> nanofibers                   | 100               | 280              | 32.2     | 4/3                | S5        |
| Au-decorated ZnO microstructures                       | 100               | 280              | 18.8     | 15/2               | S6        |
| Mo-W oxide nanofibers                                  | 100               | 375              | 26.5     | -                  | S7        |
| flower-like ZnO nanostructure                          | 300               | 100              | 18.6     | 7/24               | S8        |
| Ce doping ZnO nanoparticles                            | 100               | 300              | 20.3     | 10/9               | S9        |
| Co-doped spongy-like In <sub>2</sub> O <sub>3</sub>    | 100               | 240              | 32.808   | 1.143/37.5         | This work |

## References:

- S1. L. F. S., A. C. Catto, W. A. Jr, L. S. Cavalcante, V.R. Mastelaro, J. Andres, K. Aguir, E. Longo, *J. Alloy. Compd.*, 2016, **683**, 186-190.
- S2. X. Sun, H. Hao, H. Ji, X. Li, S. Cai and C. Zheng, *ACS applied materials & interfaces*, 2014, **6**, 401-409.
- S3. C. Liu, L. Zhao, B. Wang, P. Sun, Q. Wang, Y. Gao, X. Liang, T. Zhang and G. Lu, *Journal of colloid and interface science*, 2017, **495**, 207-215.
- S4. S. Wang, J. Cao, W. Cui, L. Fan, X. Li, D. Li, *J. Alloy. Compd.*, 2018, **758**, 45-53.
- S5. Z. Jiang, R. Zhao, B. Sun, G. Nie, H. Ji, J. Lei, C. Wang, *Ceramics International*, 2016, **42**, 15881-15888.
- S6. Y. Lin, W. Wei, Y. Wang, J. Zhou, D. Sun, X. Zhang, S. Ruan, *J. Alloy. Compd.*, 2016, **650**, 37-44.
- S7. J. Zhang, H. Lu, H. Lu, G. Li, J. Gao, Z. Yang, Y. Tian, M. Zhang, C. Wang, Z. He, *J. Alloy. Compd.*, 2019, **779**, 531-542.
- S8. C. Peng, J. Guo, W. Yang, C. Shi, M. Liu, Y. Zheng, J. Xu, P. Chen, T. Huang, Y. Yang, *J. Alloy. Compd.*, 2016, **654**, 371-378.
- S9. F.M. Li, X.B. Li, S.Y. Ma, L. Chen, W.Q. Li, C.T. Zhu, X.L. Xu, Y. Chen, Y.F. Li, G. Lawson, *J. Alloy. Compd.*, 2015, **649**, 1136-1144.
